# Supplementary material for: Policy analysis of the protection of Iranian households against catastrophic health expenditures: a qualitative analysis
Source: Springer Nature journal article supplement (doi:10.1186/s12913-023-09275-0), 2023-05-05
Supplement: MOESM2 [file 25324436]

Supplementary 2. Characteristics of participants

| <b>participants</b> |                     | <b>No.</b> |
|---------------------|---------------------|------------|
| Affiliation         | Parliaments         | 4          |
|                     | Public health care  | 4          |
|                     | Private health care | 4          |
|                     | IHIO                | 7          |
|                     | MoHME               | 8          |
|                     | Faculty member      | 8          |
| Age                 | < 50                | 16         |
|                     | >50                 | 19         |
| Gender              | Men                 | 30         |
|                     | Women               | 5          |
