# Supplementary material for: Policy analysis of the protection of Iranian households against catastrophic health expenditures: a qualitative analysis
Source: Springer Nature journal article supplement (doi:10.1186/s12913-023-09275-0), 2023-05-05
Supplement: MOESM4 [file 25324436]

Supplementary 4. Analysis of Iran stakeholders' interest, knowledge level, power, and position

| <b>Stakeholder</b>                                                        | <b>Stakeholder interest</b>  | <b>Knowledge</b> | <b>Power/adjusted power</b> | <b>Position</b> |
|---------------------------------------------------------------------------|------------------------------|------------------|-----------------------------|-----------------|
| Policy-making institutions (Iranian parliament, diagnostic council, etc.) | Decision maker               | 3                | 3.8                         | 1.9             |
| Governmental organization                                                 | Decision maker               | 3                | 4.0                         | 1.7             |
| Supreme Council of Insurance                                              | Decision maker               | 5                | 3.7                         | 2.1             |
| Ministry of Health and Medical Education (MoHME)                          | Decision maker               | 5                | 4.0                         | 1.7             |
| Ministry of Cooperatives, Labor and Social Welfare (MoCLSW)               | Decision maker               | 3                | 3.5                         | 2.1             |
| Service providers in the public sector                                    | policy executive             | 4                | 3.3                         | 2.3             |
| Service providers in the private sector                                   | policy executive             | 3                | 2.9                         | 3.1             |
| Health insurance organizations                                            | High support for targeting   | 4                | 3.6                         | 2.5             |
| pressure groups                                                           | High support for targeting   | 2                | 3.0                         | 2.9             |
| mass media                                                                | Raising awareness            | 2                | 3.0                         | 2.0             |
| General population, charity organizations, and NGOs                       | Profit and raising awareness | 2                | 2.7                         | 2.0             |
| International institutions                                                | Policy maker                 | 5                | 2.5                         | 2.4             |

Stakeholders' knowledge, self-reported, and adjusted power was attributed on a five-point scale (1 = very low; 2 = low; 3 = medium; 4 = high; 5 = very high); stakeholders' position was attributed on a five-point scale (5 = high support; 4 = support; 3 = neutral; 2 = opposition; 1 = high opposition).
